# Supplementary material for: FAMIN Is a Multifunctional Purine Enzyme Enabling the Purine Nucleotide Cycle
Source: PubMed Central journal article supplement (PMC6978800; doi:10.1016/j.cell.2019.12.017), 2020-01-23
Supplement: mmc1.pdf [file mmc1.pdf]

## Supplemental Information

### **FAMIN Is a Multifunctional Purine Enzyme**

#### **Enabling the Purine Nucleotide Cycle**

**M. Zaeem Cader, Rodrigo Pereira de Almeida Rodrigues, James A. West, Gavin W. Sewell, Muhammad N. Md-Ibrahim, Stephanie Reikine, Giuseppe Sirago, Lukas W. Unger, Ana Belén Inglesias-Romero, Katharina Ramshorn, Lea-Maxie Haag, Svetlana Saveljeva, Jana-Fabienne Ebel, Philip Rosenstiel, Nicole C. Kaneider, James C. Lee, Trevor D. Lawley, Allan Bradley, Gordon Dougan, Yorgo Modis, Julian L. Griffin, and Arthur Kaser**

**Supplemental Table 1. FAMIN variation linked to human disease**

| <b>Rare variants – monogenic disorders</b>                                 | <b>Clinical presentation</b>                                                                                                                                                                                                                                                | <b>Laboratory findings</b>                                                      | <b>Classification</b>                                                       | <b>Age of onset</b>       | <b>Background</b>                                      | <b>Ref</b>               |
|----------------------------------------------------------------------------|-----------------------------------------------------------------------------------------------------------------------------------------------------------------------------------------------------------------------------------------------------------------------------|---------------------------------------------------------------------------------|-----------------------------------------------------------------------------|---------------------------|--------------------------------------------------------|--------------------------|
| c.T850C <b>p.C284R</b><br>autosomal recessive                              | Quotidian fever, erythematous maculopapular rash; symmetrical polyarthritis of small and large joints; 9/13 with persistent systemic manifestation with intermittent fever and active polyarthritis; 4/13 with short-lived systemic manifestation and polyarticular subtype | Leukocytosis, thrombocytosis, high inflammatory markers; 8/13 ANA; 5/13 weak RF | <b>sJIA</b> (Still's disease)                                               | 3.2±1.8 yrs               | 13 patients in 5 consanguineous Saudi Arabian families | (Wakil et al., 2015)     |
| c.T850C <b>p.C284R</b><br>autosomal recessive                              | Early-onset Crohn's disease; severe debilitating arthropathy                                                                                                                                                                                                                |                                                                                 | <b>Early-onset inflammatory bowel disease</b>                               | < 10 yrs                  | 4 patients in consanguineous Saudi Arabian family      | (Patel et al., 2014)     |
| c.128_129delGT p.C43Yfs*6<br>autosomal recessive                           | RF-negative polyarticular juvenile idiopathic arthritis: chronic, symmetric polyarthritis of large and small joints, erosive in 2/3. No fever, skin rash, uveitis, or other extra-articular manifestations.                                                                 | Leukocytosis, thrombocytosis, anaemia, high inflammatory markers                | <b>JIA</b>                                                                  | 2-4 yrs                   | 3 patients in consanguineous Moroccan family           | (Arostegui et al., 2015) |
| c.827delC p.T276fs*2<br>autosomal recessive                                | Child 1: at 16 months severe polyarthritis of small & large joints, lymphadenopathy, quotidian fever without serositis or exanthema. Precursor B cell acute lymphoblastic leukaemia at age 6. Child 2: large joint arthritis, later systemic polyarthritis                  | Leukocytosis, high inflammatory markers                                         | (1) <b>sJIA</b> (Still's disease)<br>(2) extended oligoarticular <b>JIA</b> | 15 and 16 months          | 2 siblings in consanguineous Lebanese family           | (Kallinich et al., 2016) |
| c.3G>A p.0<br>autosomal recessive                                          | Polyarticular arthritis; 1/4 with fever or rash; 3/4 chronic, 1/4 episodic; 1/4 growth retardation                                                                                                                                                                          |                                                                                 | Polyarticular <b>JIA</b>                                                    | <1 yr (3/4); 2 yr (1/4)   | 4 patients in consanguineous family                    | (Karacan et al., 2018)   |
| c.1240C>T p.R414X<br>autosomal recessive                                   | Chronic polyarticular arthritis; 1/3 fever or rash; 2/3 splenomegaly                                                                                                                                                                                                        |                                                                                 | Polyarticular <b>JIA</b>                                                    | <1 yr (2/3); 2.5 yr (1/3) | 3 patients in consanguineous family                    | (Karacan et al., 2018)   |
| c.988_990del p.I330del<br>autosomal recessive                              | Fever, rash, pericarditis; chronic polyarticular arthritis; growth retardation                                                                                                                                                                                              |                                                                                 | <b>sJIA</b> (Still's disease)                                               | <1yr and 2 yrs            | 2 patients in consanguineous family                    | (Karacan et al., 2018)   |
| Compound: Het: c.1109G>A p.C370Y; Hom: c.760A>G [rs3764147] <b>p.I254V</b> | 1/2 episodic enthesitis-related juvenile arthritis; 1/2 episodic oligoarticular juvenile arthritis; 1 unaffected sibling with identical genotype                                                                                                                            |                                                                                 | <b>JIA</b>                                                                  | 10 and 7 yrs              | 2 patients in consanguineous family                    | (Karacan et al., 2018)   |
| <b>Common variants</b>                                                     | <b>Minor allele frequency</b>                                                                                                                                                                                                                                               | <b>Odds ratio</b>                                                               | <b>Disease risk</b>                                                         |                           | <b>Population</b>                                      | <b>Ref</b>               |
| rs3764147<br>c.760A>G <b>p.I254V</b>                                       | ~0.26                                                                                                                                                                                                                                                                       | 1.25                                                                            | <b>Crohn's disease</b>                                                      |                           | Caucasian                                              | (Barrett et al., 2008)   |
| rs3764147<br>c.760A>G <b>p.I254V</b>                                       | ~0.35                                                                                                                                                                                                                                                                       | 1.68                                                                            | <b>Leprosy</b>                                                              |                           | Han Chinese                                            | (Zhang et al., 2009)     |
| rs2121033 (intronic)<br>(rs9316059, intronic)                              | ~0.28                                                                                                                                                                                                                                                                       | 0.69 – 0.79                                                                     | <b>Behçet's disease</b>                                                     |                           | Turkish, Iranian and Japanese                          | (Takeuchi et al., 2017)  |

**p.I254V**: reduced ROS production, oxygen consumption (oxidative phosphorylation) and extracellular acidification (glycolysis) (Cader et al., 2016)

**p.C284R**: loss-of-function, phenotype indistinguishable from knock-out allele (Cader et al., 2016)

**Abbreviations**: ANA, anti-nuclear antibody; JIA, juvenile idiopathic arthritis; RF, rheumatoid factor; ROS, reactive oxygen species; sJIA, systemic juvenile idiopathic arthritis
